# Supplementary material for: Exploring the reported adverse effects of COVID-19 vaccines among vaccinated Arab populations: a multi-national survey study
Source: Springer Nature journal article supplement (doi:10.1038/s41598-024-54886-0), 2024-02-27
Supplement: MOESM1 [file 41598_2024_54886_MOESM1_ESM.pdf]

# Exploring the Reported Adverse Effects of COVID-19 Vaccines among Vaccinated Arab Populations: A Multi-National Survey Study

## Appendix Files

### Appendix 1: STROBE Statement: checklist of items that should be included in reports of observational studies

|                      | Item No. | Recommendation                                                                                                                                                                     | Page No. |
|----------------------|----------|------------------------------------------------------------------------------------------------------------------------------------------------------------------------------------|----------|
| Title and abstract   | 1        | (a) Indicate the study’s design with a commonly used term in the title or the abstract                                                                                             | 1        |
|                      |          | (b) Provide in the abstract an informative and balanced summary of what was done and what was found                                                                                | 2        |
| Introduction         |          |                                                                                                                                                                                    |          |
| Background/rationale | 2        | Explain the scientific background and rationale for the investigation being reported                                                                                               | 3-4      |
| Objectives           | 3        | State specific objectives, including any prespecified hypotheses                                                                                                                   | 4        |
| Methods              |          |                                                                                                                                                                                    |          |
| Study design         | 4        | Present key elements of study design early in the paper                                                                                                                            | 11       |
| Setting              | 5        | Describe the setting, locations, and relevant dates, including periods of recruitment, exposure, follow-up, and data collection                                                    | 11       |
| Participants         | 6        | (a) Cohort study—Give the eligibility criteria, and the sources and methods of selection of participants. Describe methods of follow-up                                            | 11       |
|                      |          | Case-control study—Give the eligibility criteria, and the sources and methods of case ascertainment and control selection. Give the rationale for the choice of cases and controls |          |
|                      |          | Cross-sectional study—Give the eligibility criteria, and the sources and methods of selection of participants                                                                      |          |
|                      |          | (b) Cohort study—For matched studies, give matching criteria and number of exposed and unexposed                                                                                   |          |
|                      |          | Case-control study—For matched studies, give matching criteria and the number of controls per case                                                                                 |          |
| Variables            | 7        | Clearly define all outcomes, exposures, predictors, potential confounders, and effect modifiers. Give diagnostic criteria, if applicable                                           | 11-12    |
| Data sources/        | 8*       | For each variable of interest, give sources of data and details of methods of assessment (measurement). Describe                                                                   | 11       |

|                        |     |                                                                                                                                                                                                              |              |
|------------------------|-----|--------------------------------------------------------------------------------------------------------------------------------------------------------------------------------------------------------------|--------------|
| measurement            |     | comparability of assessment methods if there is more than one group                                                                                                                                          |              |
| Bias                   | 9   | Describe any efforts to address potential sources of bias                                                                                                                                                    | <b>11-12</b> |
| Study size             | 10  | Explain how the study size was arrived at                                                                                                                                                                    | <b>11</b>    |
| Quantitative variables | 11  | Explain how quantitative variables were handled in the analyses. If applicable, describe which groupings were chosen and why                                                                                 | <b>12</b>    |
| Statistical methods    | 12  | (a) Describe all statistical methods, including those used to control for confounding                                                                                                                        | <b>12</b>    |
|                        |     | (b) Describe any methods used to examine subgroups and interactions                                                                                                                                          | <b>12</b>    |
|                        |     | (c) Explain how missing data were addressed                                                                                                                                                                  | <b>12</b>    |
|                        |     | (d) <i>Cohort study</i> —If applicable, explain how loss to follow-up was addressed                                                                                                                          | <b>12</b>    |
|                        |     | <i>Case-control study</i> —If applicable, explain how matching of cases and controls was addressed                                                                                                           |              |
|                        |     | <i>Cross-sectional study</i> —If applicable, describe analytical methods taking account of sampling strategy                                                                                                 |              |
|                        |     | (e) Describe any sensitivity analyses                                                                                                                                                                        | -            |
| <b>Results</b>         |     |                                                                                                                                                                                                              |              |
| Participants           | 13* | (a) Report numbers of individuals at each stage of study—eg numbers potentially eligible, examined for eligibility, confirmed eligible, included in the study, completing follow-up, and analysed            | <b>5</b>     |
|                        |     | (b) Give reasons for non-participation at each stage                                                                                                                                                         | -            |
|                        |     | (c) Consider use of a flow diagram                                                                                                                                                                           | -            |
| Descriptive data       | 14* | (a) Give characteristics of study participants (eg demographic, clinical, social) and information on exposures and potential confounders                                                                     | <b>5</b>     |
|                        |     | (b) Indicate number of participants with missing data for each variable of interest                                                                                                                          | -            |
|                        |     | (c) <i>Cohort study</i> —Summarise follow-up time (eg, average and total amount)                                                                                                                             |              |
| Outcome data           | 15* | <i>Cohort study</i> —Report numbers of outcome events or summary measures over time                                                                                                                          |              |
|                        |     | <i>Case-control study</i> —Report numbers in each exposure category, or summary measures of exposure                                                                                                         |              |
|                        |     | <i>Cross-sectional study</i> —Report numbers of outcome events or summary measures                                                                                                                           | <b>6</b>     |
| Main results           | 16  | (a) Give unadjusted estimates and, if applicable, confounder-adjusted estimates and their precision (eg, 95% confidence interval). Make clear which confounders were adjusted for and why they were included | <b>6</b>     |
|                        |     | (b) Report category boundaries when continuous variables were categorized                                                                                                                                    |              |
|                        |     | (c) If relevant, consider translating estimates of relative risk into absolute risk for a meaningful time period                                                                                             |              |

Continued on next page

|                          |    |                                                                                                                                                                            |            |
|--------------------------|----|----------------------------------------------------------------------------------------------------------------------------------------------------------------------------|------------|
| Other analyses           | 17 | Report other analyses done—eg analyses of subgroups and interactions, and sensitivity analyses                                                                             | <b>5-6</b> |
| <b>Discussion</b>        |    |                                                                                                                                                                            |            |
| Key results              | 18 | Summarise key results with reference to study objectives                                                                                                                   | <b>7-8</b> |
| Limitations              | 19 | Discuss limitations of the study, taking into account sources of potential bias or imprecision. Discuss both direction and magnitude of any potential bias                 | <b>9</b>   |
| Interpretation           | 20 | Give a cautious overall interpretation of results considering objectives, limitations, multiplicity of analyses, results from similar studies, and other relevant evidence | <b>7-8</b> |
| Generalisability         | 21 | Discuss the generalisability (external validity) of the study results                                                                                                      | <b>9</b>   |
| <b>Other information</b> |    |                                                                                                                                                                            |            |
| Funding                  | 22 | Give the source of funding and the role of the funders for the present study and, if applicable, for the original study on which the present article is based              | <b>13</b>  |

\*Give information separately for cases and controls in case-control studies and, if applicable, for exposed and unexposed groups in cohort and cross-sectional studies.

**Note:** An Explanation and Elaboration article discusses each checklist item and gives methodological background and published examples of transparent reporting. The STROBE checklist is best used in conjunction with this article (freely available on the Web sites of PLoS Medicine at <http://www.plosmedicine.org/>, Annals of Internal Medicine at <http://www.annals.org/>, and Epidemiology at <http://www.epidem.com/>). Information on the STROBE Initiative is available at [www.strobe-statement.org](http://www.strobe-statement.org).

## Appendix 2: Context of sampling and vaccination process

| By 1st of January 2022   | Total Population | Infected  | 1st dose            | 2nd dose            | Booster dose                                                          | Types of vaccines                                                                   | Sample size |
|--------------------------|------------------|-----------|---------------------|---------------------|-----------------------------------------------------------------------|-------------------------------------------------------------------------------------|-------------|
| <b>Saudi Arabia (SA)</b> | 35,683,504       | 590,871   | 25,501,361 (71.5%)  | 23,647,878 (91.9%)  | Compulsory by 1st February 2022                                       | J&J, Astra-Zeneca, Pfizer and Moderna                                               | 444 (28.45) |
| <b>Egypt</b>             | 118,600,000      | 384,728   | 35,345,794 (29.8%)  | 22,829,583 (19.25%) | Started among HCPs, and risky groups after 6 months from the 2nd dose | J&J , Astra-Zeneca, Pfizer, Moderna, Sputnik V, Sputnik - Light, Sinovac, Sinopharm | 345 (22.0%) |
| <b>Libya</b>             | 7,018,138        | 389,650   | 1, 872, 292 (26.7%) | 851,595 (12.1 %)    | Not started                                                           | Astra-Zeneca, Sputnik V, Sputnik –Light, Sinopharm and Pfizer                       | 218 (14.0%) |
| <b>Algeria</b>           | 45,106,964       | 218,037   | 7,245,900 (16.1%)   | 5,786,000 (12.82%)  | Started 18 December 2021                                              | Astra-Zeneca, Sputnik V and Sputnik -Light,                                         | 213 (13.0%) |
| <b>Iraqi</b>             | 41,685,691       | 2,093,740 | 8 735 048 (21%)     | 5,801,589 (13.9%)   | Not started yet                                                       | Astra-Zeneca, Sputnik V, Sputnik -Light, Sinovac and Sinopharm.                     | 183 (11.7)  |
| <b>Syria</b>             | 18,300,000       | 2,474,778 | 2,835,406 (15.5%)   | 50,205 (0.3%)       | Not started yet                                                       | Astra-Zeneca, Sputnik V, Sputnik –Light and Sinopharm                               | 124 (7.9%)  |

### Appendix 3: The study questionnaire in English and Arabic languages.

الأعراض الجانبية للتحصين ضد فيروس كورونا المستجد بعد  
الجرعات المختلفة ومحدداتها بين المحصنين أثناء الموجة الرابعة لوباء الكورونا

*((Side effects of vaccination against the emerging coronavirus after different doses and their determinants among those vaccinated during the fourth wave of the coronavirus pandemic))*

#### الموافقة المستنيرة:

نحن مجموعة من الاطباء الباحثين ، تستهدف هذه الدراسة كل الفئات المحصنة لدراسة الأعراض الجانبية للتحصين ضد فيروس كورونا المستجد بعد الجرعات المختلفة علما بان هذه البيانات سرية ،لن تستخدم الا لأغراض بحثية ،في حال وجود اي استفسار الرجاء التواصل مع الباحث الرئيسي.

#### Informed Consent:

*((We are a group of research doctors. This study targets all immunized groups to study the side effects of vaccination against the emerging coronavirus after different doses. Note that this data is confidential and will only be used for research purposes. If you have any questions, please contact the principal researcher.))*

[amers@moh.gov.sa](mailto:amers@moh.gov.sa)

1. هل توافق علي المشاركة:

*((1.Do you agree to participate: ))*

نعم ☐ لا ☐

*((yes )) ((No ))*

2. هل تلقيت اللقاح ضد فيروس كورونا المستجد :

*(( 2.Have you received the vaccine against the emerging coronavirus?))*

نعم ☐ لا ☐ (No)

نعم بشكل اختياري (Yes, voluntary) ☐

نعم بشكل اجباري للعمل،السفر، أو التعليم ( Yes, compulsorily for work, travel, or school...) ☐

3. العمر بعدد السنوات :

*((3.Age in years : ))*

|                                                                                    |                                                                                    |                                                                                    |                                                                                    |
|------------------------------------------------------------------------------------|------------------------------------------------------------------------------------|------------------------------------------------------------------------------------|------------------------------------------------------------------------------------|
| <input type="checkbox"/> من 45 الي اقل من 60<br><i>((From 45 to less than 60))</i> | <input type="checkbox"/> من 30 الي اقل من 45<br><i>((From 30 to less than 45))</i> | <input type="checkbox"/> من 18 الي اقل من 30<br><i>((From 18 to less than 30))</i> | <input type="checkbox"/> من 12 الي اقل من 18<br><i>((From 12 to less than 18))</i> |
|                                                                                    |                                                                                    | <input type="checkbox"/> 75 عام فاكثر<br><i>(( 75 years or more))</i>              | <input type="checkbox"/> من 60 الي اقل من 75<br><i>((From 60 to less than 75))</i> |

4. الجنس

*((4.Sex))*

Female ☐ انثي. ☐ ذكر Male

5. مستوى التعليم

((5.Educational level))

|                                                                                                        |                                                                                   |                                                                                                   |
|--------------------------------------------------------------------------------------------------------|-----------------------------------------------------------------------------------|---------------------------------------------------------------------------------------------------|
| <input type="checkbox"/> دراسات عليا / عليم جامعي<br>((University education/<br>postgraduate studies)) | <input type="checkbox"/> ثانوي / تعليم متوسط<br>((Middle/secondary<br>education)) | <input type="checkbox"/> تعليم ابتدائي / يقرأ ويكتب<br>((Primary education/ reads and<br>writes)) |
|--------------------------------------------------------------------------------------------------------|-----------------------------------------------------------------------------------|---------------------------------------------------------------------------------------------------|

6. الوظيفة الحالية :

((6.current occupation: ))

|                                                            |                                                                          |                                                                                         |
|------------------------------------------------------------|--------------------------------------------------------------------------|-----------------------------------------------------------------------------------------|
| <input type="checkbox"/> يعمل في مجالات أخرى<br>((others)) | <input type="checkbox"/> يعمل في المجال الطبي<br>((works in healthcare)) | <input type="checkbox"/> طالب / ربة منزل / لا يعمل<br>((Not working/housewife/student)) |
|------------------------------------------------------------|--------------------------------------------------------------------------|-----------------------------------------------------------------------------------------|

7. محل السكن:

((7.Current residence ))

|                                                                        |                                                                            |
|------------------------------------------------------------------------|----------------------------------------------------------------------------|
| <input type="checkbox"/> خارج المدينة (ريف)<br>((Out of city (rural))) | <input type="checkbox"/> داخل المدينة (حضر)<br>((Within the city (urban))) |
|------------------------------------------------------------------------|----------------------------------------------------------------------------|

8. الوزن بالكيلو: \_\_\_\_\_ ((8.Weight in kilograms ))

9. الطول بالمتر: \_\_\_\_\_ ((9.Height in meters ))

10 - الجنسية :

|                                          |                                              |
|------------------------------------------|----------------------------------------------|
| <input type="checkbox"/> سوري ((Syrian)) | <input type="checkbox"/> ليبي ((Libyan))     |
| <input type="checkbox"/> عراقي ((Iraqi)) | <input type="checkbox"/> مصري ((Egyptian))   |
| <input type="checkbox"/> اخري ((others)) | <input type="checkbox"/> سعودي ((Saudi))     |
|                                          | <input type="checkbox"/> جزائري ((Algerian)) |

((10.nationality))

11. هل تعاني من امراض مزمنة؟

((11.Do you have any chronic illness?))

|                                                                                                                                          |
|------------------------------------------------------------------------------------------------------------------------------------------|
| <input type="checkbox"/> لا<br>((No ))                                                                                                   |
| <input type="checkbox"/> مرض عضوي... كالضغط او السكر.... الخ<br>((Organic illness like<br>hypertension,diabetes,..etc))                  |
| <input type="checkbox"/> مرض نفسي عصبي ... كالقلق او الاكتئاب .... الخ.<br>((psychological illness like anxiety,<br>depression,....etc)) |

12. هل تتلقي احدي هذه العلاجات:

((12.Do you take treatment for one Or more of the following: ))

|                                                                                                                 |
|-----------------------------------------------------------------------------------------------------------------|
| <input type="checkbox"/> علاج هرموني ((hormonal therapy))                                                       |
| <input type="checkbox"/> علاج احد الأمراض المناعية ((immunity therapy))                                         |
| <input type="checkbox"/> كورتيزون أو احد الادوية المثبطة بالمناعة. ((Cortisone or an immunosuppressive drug. )) |
| <input type="checkbox"/> مكملات غذائية. ((dietary supplement))                                                  |
| <input type="checkbox"/> أدوية لسيولة الدم ((blood thinning medications ))                                      |

13 . هل اصبت بعدوي (كوفيد ١٩) قبل اللقاح:

((13.have you had (Covid-19) infection before the vaccine))

|                                                                                                                                                                                   |
|-----------------------------------------------------------------------------------------------------------------------------------------------------------------------------------|
| <input type="checkbox"/> لا ((no))                                                                                                                                                |
| <input type="checkbox"/> نعم... إصابة من دون اعراض ((Yes... an infection without symptoms))                                                                                       |
| <input type="checkbox"/> نعم...إصابة بأعراض وتم علاجي في المنزل ((Yes...I had symptoms and was treated at home ))                                                                 |
| <input type="checkbox"/> نعم...إصابه بأعراض وتم علاجي في المستشفى ((Yes...I had symptoms and was treated in the hospital))                                                        |
| <input type="checkbox"/> اشتباه.. (فقدان شم، تذوق، حرارة) من دون فحص او عينة سلبية. ((Suspicion... (loss of smell, taste, fever) without medical examination or a negative test)) |

14. اين تلقيت اللقاح ضد فيروس كورونا المستجد:

((14.Where did you receive the vaccine against the emerging coronavirus?))

|                                                                                                                           |
|---------------------------------------------------------------------------------------------------------------------------|
| <input type="checkbox"/> في حملة متنقلة في.. (نادي، مول، العمل.. الخ) ((On a mobile campaign ...(club, mall, work, etc.)) |
| <input type="checkbox"/> في مركز رعاية صحية أولية ((In a primary health care center))                                     |
| <input type="checkbox"/> في مستشفى او مركز لقاحات ((In a hospital or vaccination center))                                 |

|                                                                                                                  |                                                                                    |                                                         |                                                 |                                                   |
|------------------------------------------------------------------------------------------------------------------|------------------------------------------------------------------------------------|---------------------------------------------------------|-------------------------------------------------|---------------------------------------------------|
| 15. اذكر نوع اللقاح الذي اخذته في الجرعة الأولى:<br>((15.Choose the type of vaccine you took in the first dose)) |                                                                                    |                                                         |                                                 |                                                   |
| <input type="checkbox"/> مودرنا<br>((Moderna))                                                                   | <input type="checkbox"/> جونسون اند جونسون<br>((The Johnson & Johnson (Janssen) )) | <input type="checkbox"/> استرازينيكا<br>((astrazeneca)) | <input type="checkbox"/> فايزر<br>((Pfizer))    | <input type="checkbox"/> سيوفارم<br>((Sinopharm)) |
| <input type="checkbox"/> لا اعرف النوع<br>((I don't know the type ))                                             | <input type="checkbox"/> سبيوتنيك لايت<br>((Sputnik light))                        | <input type="checkbox"/> سبيوتنيك في<br>((Sputnik V))   | <input type="checkbox"/> سينوفاك<br>((Sinovet)) | اخرى<br>((others))                                |

16. الأعراض الجانبية بعد الجرعة الأولى ( أختار كل ما تراه مناسباً ) ( مسموح بأكثر من إجابة ) :

((16.Side effects after the first dose (Choose all you deem appropriate (More than one answer is allowed))))

|                          |                                                                                                                                                                                                     |
|--------------------------|-----------------------------------------------------------------------------------------------------------------------------------------------------------------------------------------------------|
| <input type="checkbox"/> | لا يوجد (( none ))                                                                                                                                                                                  |
| <input type="checkbox"/> | آلام /تقل /احمرار/ورم في الذراع ((Pain/heaviness/redness/swelling in the arm))                                                                                                                      |
| <input type="checkbox"/> | غثيان أو قيء ((Nausea or vomiting))                                                                                                                                                                 |
| <input type="checkbox"/> | تكسير في الجسم ((body aches))                                                                                                                                                                       |
| <input type="checkbox"/> | آلام العظام والعضلات ((Bone and muscle pain))                                                                                                                                                       |
| <input type="checkbox"/> | خمول وإرهاق عام ((Lethargy and general fatigue))                                                                                                                                                    |
| <input type="checkbox"/> | (الحساسية المفرطة) علي شكل طفح جلدي /التهاب بالاعشبة المخاطية المبطنة للأنف والأذن<br>(((Hypersensitivity) in the form of a skin rash/inflammation of the mucous membranes lining the nose or ear)) |
| <input type="checkbox"/> | صداع ((headache))                                                                                                                                                                                   |
| <input type="checkbox"/> | تشنجات أو صرع ((Convulsions or epilepsy))                                                                                                                                                           |
| <input type="checkbox"/> | سيلان .أو احتقان في الأنف ((runny nose. Or nasal congestion))                                                                                                                                       |
| <input type="checkbox"/> | (احتباس السوائل بالجسم) بمنطقة الجفون -القدمين -البطن<br>((Fluid retention in the body (in the eyelids, feet, and abdomen).))                                                                       |
| <input type="checkbox"/> | حدوث جلطات ((abnormal clot formation))                                                                                                                                                              |
| <input type="checkbox"/> | انخفاض الصفائح الدموية ((low platelet count))                                                                                                                                                       |
| <input type="checkbox"/> | آلام في الصدر ((chest pain))                                                                                                                                                                        |
| <input type="checkbox"/> | صعوبات في التنفس ((difficulty breathing))                                                                                                                                                           |
| <input type="checkbox"/> | آلام مستمرة في المعدة ((prolonged abdominal pain))                                                                                                                                                  |
| <input type="checkbox"/> | اضطرابات في الرؤية ((visual disturbances))                                                                                                                                                          |
| <input type="checkbox"/> | التهابات في عضلة القلب -زيادته ، اضطرابات بضرابات القلب<br>((Inflammation of the heart muscle -increased heart rate, disturbances in heart rhythm))                                                 |
| <input type="checkbox"/> | تغيير في طبيعة الدورة الشهرية (انقطاعها /تغيير في الكمي /اضطرابها)<br>(((Change in the nature of the menstrual cycle) its cessation / change in quantity / disturbance))                            |
| <input type="checkbox"/> | ظهور أو تورم العقد الليمفاوية ((The appearance or swelling of lymph nodes))                                                                                                                         |
| <input type="checkbox"/> | اضطرابات نفسية أو عصبية ((Psychological or nervous disorders))                                                                                                                                      |
| <input type="checkbox"/> | اضطرابات بضغط الدم ((Blood pressure disorders))                                                                                                                                                     |
| <input type="checkbox"/> | اضطرابات وظائف الكبد ((Liver function disorders))                                                                                                                                                   |
| <input type="checkbox"/> | اضطرابات وظائف الكلي /التهاب الكلي /بول رغوي<br>((Kidney function disorders/nephritis/frothy urine))                                                                                                |
| <input type="checkbox"/> | ظهور امراض او اضطرابات بالمناعة ((The appearance of diseases or immune disorders))                                                                                                                  |



|                                                                                           |                                                                                                                                                                                                                                       |
|-------------------------------------------------------------------------------------------|---------------------------------------------------------------------------------------------------------------------------------------------------------------------------------------------------------------------------------------|
| <input type="checkbox"/>                                                                  | سقوط في الشعر - او ظهور شعر ابيض بمعدل اكثر من الطبيعي<br>((Hair loss - or the appearance of white hair at a rate greater than normal))                                                                                               |
| <input type="checkbox"/>                                                                  | مشاكل في الجلد / ظهور بقع بيضاء / كدمات زرقاء او بقع حمراء<br>((Skin problems / appearance of white spots / blue bruises or red spots))                                                                                               |
| <input type="checkbox"/>                                                                  | (في حال كنت حامل) حدث اجهاض / ولادة مبكرة / اي مضاعفات اخري<br>((If you are pregnant (miscarriage / premature birth / any other complications).))                                                                                     |
| <input type="checkbox"/>                                                                  | (في حال كنت مرضع) .هل تأثرت الرضاعة او الرضيع<br>(((If you are breastfeeding). Has breastfeeding and the baby been affected?))                                                                                                        |
| <input type="checkbox"/>                                                                  | (متلازمة جيلان باري) (ضعف عضلي سريع) او اضطرابات التهابات في الجهاز العصبي (المخ , الغشاء السحائي)<br>((Guillain-Barré syndrome (rapid muscle weakness) or inflammatory disorders of the nervous system (brain, meningeal membrane))) |
| <input type="checkbox"/>                                                                  | تأثر حاسة السمع ((hearing affection))                                                                                                                                                                                                 |
| <input type="checkbox"/>                                                                  | فقدان حاسة الشم او التذوق ((loss of smell or taste))                                                                                                                                                                                  |
| <input type="checkbox"/>                                                                  | اضطرابات في النوم ((sleep disturbances))                                                                                                                                                                                              |
| في حال وجود أعراض أخرى أذكرها ((if you experienced other symptoms, please mention them )) |                                                                                                                                                                                                                                       |

17. كيف تعاملت مع مضاعفات الجرعة الاولى (مسموح بأكثر من إجابة):

((17. How did you deal with complications from the first dose (more than one answer is allowed): ))

|                                             |                                                                                            |                                                                            |                                                                                         |
|---------------------------------------------|--------------------------------------------------------------------------------------------|----------------------------------------------------------------------------|-----------------------------------------------------------------------------------------|
| <input type="checkbox"/> لا شيء<br>((none)) | <input type="checkbox"/> خفضت الحرارة<br>ومسكنات الألم<br>((painkillers and antipyretics)) | <input type="checkbox"/> إستشارة طبية<br>((I sought medical consultation)) | <input type="checkbox"/> تم حجزني بأحد المستشفيات<br>((I was admitted to the hospital)) |
|---------------------------------------------|--------------------------------------------------------------------------------------------|----------------------------------------------------------------------------|-----------------------------------------------------------------------------------------|

18. هل اصبت بعدوي الكورونا بعد الجرعة الاولى للتطعيم :

((18.have you had COVID-19 infection after first dose of the vaccine: ))

|                          |                                                                                                         |
|--------------------------|---------------------------------------------------------------------------------------------------------|
| <input type="checkbox"/> | لا ((no))                                                                                               |
| <input type="checkbox"/> | نعم ... بدون اعراض ((Yes...without symptoms))                                                           |
| <input type="checkbox"/> | نعم.....اصبت باعراض وتم علاجي في المنزل<br>((Yes.....I had symptoms and was treated at home))           |
| <input type="checkbox"/> | نعم. .. اصبت باعراض وتم علاجي في المستشفى<br>((Yes. ...I had symptoms and was treated in the hospital)) |

|                                                                                                                    |                                                                                    |                                                         |                                                 |                                                    |
|--------------------------------------------------------------------------------------------------------------------|------------------------------------------------------------------------------------|---------------------------------------------------------|-------------------------------------------------|----------------------------------------------------|
| 19. اذكر نوع اللقاح الذي اخذته في الجرعة الثانية:<br>((19.Choose the type of vaccine you took in the second dose)) |                                                                                    |                                                         |                                                 |                                                    |
| <input type="checkbox"/> مودرنا<br>((Moderna))                                                                     | <input type="checkbox"/> جونسون اند جونسون<br>((The Johnson & Johnson (Janssen) )) | <input type="checkbox"/> استرازينيكا<br>((astrazeneca)) | <input type="checkbox"/> فايزر<br>((Pfizer))    | <input type="checkbox"/> سيفوفارم<br>((Sinopharm)) |
| <input type="checkbox"/> لا اعرف النوع<br>((I don't know the type ))                                               | <input type="checkbox"/> سبيوتنيك لايت<br>((Sputnik light))                        | <input type="checkbox"/> سبيوتنيك في<br>((Sputnik V))   | <input type="checkbox"/> سينوفاك<br>((Sinovet)) | اخرى<br>((others))                                 |

20. الأعراض الجانبية بعد الجرعة الثانية ( أختار كل ما تراه مناسباً ) ( مسموح بأكثر من إجابة ) :

((20.Side effects after the second dose (Choose all you deem appropriate (More than one answer is allowed))))

|                          |                                                                                                                                                                                                     |
|--------------------------|-----------------------------------------------------------------------------------------------------------------------------------------------------------------------------------------------------|
| <input type="checkbox"/> | لا يوجد (( none ))                                                                                                                                                                                  |
| <input type="checkbox"/> | آلام /تقل /احمرار/ورم في الذراع ((Pain/heaviness/redness/swelling in the arm))                                                                                                                      |
| <input type="checkbox"/> | غثيان أو قيء ((Nausea or vomiting))                                                                                                                                                                 |
| <input type="checkbox"/> | تكسير في الجسم ((body aches))                                                                                                                                                                       |
| <input type="checkbox"/> | آلام العظام والعضلات ((Bone and muscle pain))                                                                                                                                                       |
| <input type="checkbox"/> | خمول وإرهاق عام ((Lethargy and general fatigue))                                                                                                                                                    |
| <input type="checkbox"/> | (الحساسية المفرطة) علي شكل طفح جلدي /التهاب بالاعشبة المخاطية المبطنة للأنف والأذن<br>(((Hypersensitivity) in the form of a skin rash/inflammation of the mucous membranes lining the nose or ear)) |
| <input type="checkbox"/> | صداع ((headache))                                                                                                                                                                                   |
| <input type="checkbox"/> | تشنجات أو صرع ((Convulsions or epilepsy))                                                                                                                                                           |
| <input type="checkbox"/> | سيلان .أو احتقان في الأنف ((runny nose. Or nasal congestion))                                                                                                                                       |
| <input type="checkbox"/> | (احتباس السوائل بالجسم) بمنطقة الجفون -القدمين -البطن<br>((Fluid retention in the body (in the eyelids, feet, and abdomen).))                                                                       |
| <input type="checkbox"/> | حدوث جلطات ((abnormal clot formation))                                                                                                                                                              |
| <input type="checkbox"/> | انخفاض الصفائح الدموية ((low platelet count))                                                                                                                                                       |
| <input type="checkbox"/> | آلام في الصدر ((chest pain))                                                                                                                                                                        |
| <input type="checkbox"/> | صعوبات في التنفس ((difficulty breathing))                                                                                                                                                           |
| <input type="checkbox"/> | آلام مستمرة في المعدة ((prolonged abdominal pain))                                                                                                                                                  |
| <input type="checkbox"/> | اضطرابات في الرؤية ((visual disturbances))                                                                                                                                                          |
| <input type="checkbox"/> | التهابات في عضلة القلب -زيادته ، اضطرابات بضرابات القلب<br>((Inflammation of the heart muscle -increased heart rate, disturbances in heart rhythm))                                                 |
| <input type="checkbox"/> | تغيير في طبيعة الدورة الشهرية (انقطاعها /تغيير في الكمي /اضطرابها)<br>(((Change in the nature of the menstrual cycle) its cessation / change in quantity / disturbance))                            |
| <input type="checkbox"/> | ظهور أو تورم العقد الليمفاوية ((The appearance or swelling of lymph nodes))                                                                                                                         |
| <input type="checkbox"/> | اضطرابات نفسية أو عصبية ((Psychological or nervous disorders))                                                                                                                                      |
| <input type="checkbox"/> | اضطرابات بضغط الدم ((Blood pressure disorders))                                                                                                                                                     |
| <input type="checkbox"/> | اضطرابات وظائف الكبد ((Liver function disorders))                                                                                                                                                   |
| <input type="checkbox"/> | اضطرابات وظائف الكلي /التهاب الكلي /بول رغوي<br>((Kidney function disorders/nephritis/frothy urine))                                                                                                |
| <input type="checkbox"/> | ظهور امراض او اضطرابات بالمناعة ((The appearance of diseases or immune disorders))                                                                                                                  |

|                                                                                           |                                                                                                                                                                                                                                       |
|-------------------------------------------------------------------------------------------|---------------------------------------------------------------------------------------------------------------------------------------------------------------------------------------------------------------------------------------|
| <input type="checkbox"/>                                                                  | سقوط في الشعر - او ظهور شعر ابيض بمعدل اكثر من الطبيعي<br>((Hair loss - or the appearance of white hair at a rate greater than normal))                                                                                               |
| <input type="checkbox"/>                                                                  | مشاكل في الجلد / ظهور بقع بيضاء / كدمات زرقاء او بقع حمراء<br>((Skin problems / appearance of white spots / blue bruises or red spots))                                                                                               |
| <input type="checkbox"/>                                                                  | (في حال كنت حامل) حدث اجهاض / ولادة مبكره / اي مضاعفات اخري<br>((If you are pregnant (miscarriage / premature birth / any other complications).))                                                                                     |
| <input type="checkbox"/>                                                                  | (في حال كنت مرضع) .هل تأثرت الرضاعة او الرضيع<br>(((If you are breastfeeding). Has breastfeeding and the baby been affected?))                                                                                                        |
| <input type="checkbox"/>                                                                  | (متلازمة جيلان باري) (ضعف عضلي سريع) او اضطرابات التهابات في الجهاز العصبي (المخ , الغشاء السحائي)<br>((Guillain-Barré syndrome (rapid muscle weakness) or inflammatory disorders of the nervous system (brain, meningeal membrane))) |
| <input type="checkbox"/>                                                                  | تأثر حاسة السمع ((hearing affection))                                                                                                                                                                                                 |
| <input type="checkbox"/>                                                                  | فقدان حاسة الشم او التذوق ((loss of smell or taste))                                                                                                                                                                                  |
| <input type="checkbox"/>                                                                  | اضطرابات في النوم ((sleep disturbances))                                                                                                                                                                                              |
| في حال وجود أعراض أخرى أذكرها ((if you experienced other symptoms, please mention them )) |                                                                                                                                                                                                                                       |

21. كيف تعاملت مع مضاعفات الجرعة الثانية (مسموح بأكثر من إجابة):

((21. How did you deal with complications from the second dose (more than one answer is allowed): ))

|                                             |                                                                                            |                                                                            |                                                                                         |
|---------------------------------------------|--------------------------------------------------------------------------------------------|----------------------------------------------------------------------------|-----------------------------------------------------------------------------------------|
| <input type="checkbox"/> لا شيء<br>((none)) | <input type="checkbox"/> خفضت الحرارة<br>ومسكنات الألم<br>((painkillers and antipyretics)) | <input type="checkbox"/> إستشارة طبية<br>((I sought medical consultation)) | <input type="checkbox"/> تم حجزني بأحد المستشفيات<br>((I was admitted to the hospital)) |
|---------------------------------------------|--------------------------------------------------------------------------------------------|----------------------------------------------------------------------------|-----------------------------------------------------------------------------------------|

22. هل اصبت بعدوي الكورونا بعد الجرعة الثانية للتطعيم :

((22.have you had COVID-19 infection after second dose of the vaccine: ))

|                          |                                                                                                         |
|--------------------------|---------------------------------------------------------------------------------------------------------|
| <input type="checkbox"/> | لا ((no))                                                                                               |
| <input type="checkbox"/> | نعم ... بدون اعراض ((Yes...without symptoms))                                                           |
| <input type="checkbox"/> | نعم.....اصبت باعراض وتم علاجي في المنزل<br>((Yes.....I had symptoms and was treated at home))           |
| <input type="checkbox"/> | نعم. .. اصبت باعراض وتم علاجي في المستشفى<br>((Yes. ...I had symptoms and was treated in the hospital)) |

|                                                                                                                   |                                                                                    |                                                         |                                                 |                                                    |
|-------------------------------------------------------------------------------------------------------------------|------------------------------------------------------------------------------------|---------------------------------------------------------|-------------------------------------------------|----------------------------------------------------|
| 23. اذكر نوع اللقاح الذي اخذته في الجرعة الثالثة:<br>((23.Choose the type of vaccine you took in the third dose)) |                                                                                    |                                                         |                                                 |                                                    |
| <input type="checkbox"/> مودرنا<br>((Moderna))                                                                    | <input type="checkbox"/> جونسون اند جونسون<br>((The Johnson & Johnson (Janssen) )) | <input type="checkbox"/> استرازينيكا<br>((astrazeneca)) | <input type="checkbox"/> فايزر<br>((Pfizer))    | <input type="checkbox"/> سيفوفارم<br>((Sinopharm)) |
| <input type="checkbox"/> لا اعرف النوع<br>((I don't know the type ))                                              | <input type="checkbox"/> سبيوتنيك لايت<br>((Sputnik light))                        | <input type="checkbox"/> سبيوتنيك في<br>((Sputnik V))   | <input type="checkbox"/> سينوفاك<br>((Sinovet)) | اخرى<br>((others))                                 |

24. الأعراض الجانبية بعد الجرعة الثالثة ( أختار كل ما تراه مناسباً ) ( مسموح بأكثر من إجابة ) :

((24.Side effects after the third dose (Choose all you deem appropriate (More than one answer is allowed))))

|                          |                                                                                                                                                                                                     |
|--------------------------|-----------------------------------------------------------------------------------------------------------------------------------------------------------------------------------------------------|
| <input type="checkbox"/> | لا يوجد (( none ))                                                                                                                                                                                  |
| <input type="checkbox"/> | آلام /ثقل /احمرار/ورم في الذراع ((Pain/heaviness/redness/swelling in the arm))                                                                                                                      |
| <input type="checkbox"/> | غثيان او قيء ((Nausea or vomiting))                                                                                                                                                                 |
| <input type="checkbox"/> | تكسير في الجسم ((body aches))                                                                                                                                                                       |
| <input type="checkbox"/> | آلام العظام والعضلات ((Bone and muscle pain))                                                                                                                                                       |
| <input type="checkbox"/> | خمول وارهاق عام ((Lethargy and general fatigue))                                                                                                                                                    |
| <input type="checkbox"/> | (الحساسية المفرطة) علي شكل طفح جلدي / التهاب بالاغشية المخاطية المبطن للأنف والأذن<br>(((Hypersensitivity) in the form of a skin rash/inflammation of the mucous membranes lining the nose or ear)) |
| <input type="checkbox"/> | صداع ((headache))                                                                                                                                                                                   |
| <input type="checkbox"/> | تشنجات او صرع ((Convulsions or epilepsy))                                                                                                                                                           |
| <input type="checkbox"/> | سيلان .او احتقان في الأنف ((runny nose. Or nasal congestion))                                                                                                                                       |
| <input type="checkbox"/> | (احتباس السوائل بالجسم) بمنطقة الجفون -القدمين -البطن<br>((Fluid retention in the body (in the eyelids, feet, and abdomen).))                                                                       |
| <input type="checkbox"/> | حدوث جلطات ((abnormal clot formation))                                                                                                                                                              |
| <input type="checkbox"/> | انخفاض الصفائح الدموية ((low platelet count))                                                                                                                                                       |
| <input type="checkbox"/> | آلام في الصدر ((chest pain))                                                                                                                                                                        |
| <input type="checkbox"/> | صعوبات في التنفس ((difficulty breathing))                                                                                                                                                           |
| <input type="checkbox"/> | آلام مستمرة في المعدة ((prolonged abdominal pain))                                                                                                                                                  |
| <input type="checkbox"/> | اضطرابات في الرؤية ((visual disturbances))                                                                                                                                                          |
| <input type="checkbox"/> | التهابات في عضلة القلب -زيادته ، اضطرابات بضربات القلب<br>((Inflammation of the heart muscle -increased heart rate, disturbances in heart rhythm))                                                  |
| <input type="checkbox"/> | تغيير في طبيعة الدورة الشهرية (انقطاعها /تغيير في الكمي /اضطرابها)<br>(((Change in the nature of the menstrual cycle) its cessation / change in quantity / disturbance))                            |
| <input type="checkbox"/> | ظهور او تورم العقد الليمفاوية ((The appearance or swelling of lymph nodes))                                                                                                                         |
| <input type="checkbox"/> | اضطرابات نفسية او عصبية ((Psychological or nervous disorders))                                                                                                                                      |
| <input type="checkbox"/> | اضطرابات بضغط الدم ((Blood pressure disorders))                                                                                                                                                     |
| <input type="checkbox"/> | اضطرابات وظائف الكبد ((Liver function disorders))                                                                                                                                                   |
| <input type="checkbox"/> | اضطرابات وظائف الكلي /التهاب الكلي /بول رغوي<br>((Kidney function disorders/nephritis/frothy urine))                                                                                                |
| <input type="checkbox"/> | ظهور امراض او اضطرابات بالمناعة ((The appearance of diseases or immune disorders))                                                                                                                  |

|                                                                                           |                                                                                                                                                                                                                                       |
|-------------------------------------------------------------------------------------------|---------------------------------------------------------------------------------------------------------------------------------------------------------------------------------------------------------------------------------------|
| <input type="checkbox"/>                                                                  | سقوط في الشعر - او ظهور شعر ابيض بمعدل اكثر من الطبيعي<br>((Hair loss - or the appearance of white hair at a rate greater than normal))                                                                                               |
| <input type="checkbox"/>                                                                  | مشاكل في الجلد / ظهور بقع بيضاء / كدمات زرقاء او بقع حمراء<br>((Skin problems / appearance of white spots / blue bruises or red spots))                                                                                               |
| <input type="checkbox"/>                                                                  | (في حال كنت حامل) حدث اجهاض / ولادة مبكرة / اي مضاعفات اخري<br>((If you are pregnant (miscarriage / premature birth / any other complications).))                                                                                     |
| <input type="checkbox"/>                                                                  | (في حال كنت مرضع) هل تأثرت الرضاعة او الرضيع<br>(((If you are breastfeeding). Has breastfeeding and the baby been affected?))                                                                                                         |
| <input type="checkbox"/>                                                                  | (متلازمة جيلان باري ( ضعف عضلي سريع) او اضطرابات التهابات في الجهاز العصبي (المخ , الغشاء السحائي)<br>((Guillain-Barré syndrome (rapid muscle weakness) or inflammatory disorders of the nervous system (brain, meningeal membrane))) |
| <input type="checkbox"/>                                                                  | تأثر حاسة السمع ((hearing affection))                                                                                                                                                                                                 |
| <input type="checkbox"/>                                                                  | فقدان حاسة الشم او التذوق ((loss of smell or taste))                                                                                                                                                                                  |
| <input type="checkbox"/>                                                                  | اضطرابات في النوم ((sleep disturbances))                                                                                                                                                                                              |
| في حال وجود أعراض أخرى أذكرها ((if you experienced other symptoms, please mention them )) |                                                                                                                                                                                                                                       |

25. كيف تعاملت مع مضاعفات الجرعة الثالثة (مسموح بأكثر من إجابة):

((25. How did you deal with complications from the third dose (more than one answer is allowed): ))

|                                             |                                                                                              |                                                                            |                                                                                         |
|---------------------------------------------|----------------------------------------------------------------------------------------------|----------------------------------------------------------------------------|-----------------------------------------------------------------------------------------|
| <input type="checkbox"/> لا شيء<br>((none)) | <input type="checkbox"/> خافضات الحرارة<br>ومسكنات الألم<br>((painkillers and antipyretics)) | <input type="checkbox"/> إستشارة طبية<br>((I sought medical consultation)) | <input type="checkbox"/> تم حجزني بأحد المستشفيات<br>((I was admitted to the hospital)) |
|---------------------------------------------|----------------------------------------------------------------------------------------------|----------------------------------------------------------------------------|-----------------------------------------------------------------------------------------|

26. هل أصبت بعدوي الكورونا بعد الجرعة الثالثة للتطعيم :

((26.have you had COVID-19 infection after third dose of the vaccine: ))

|                          |                                                                                                         |
|--------------------------|---------------------------------------------------------------------------------------------------------|
| <input type="checkbox"/> | لا ((no))                                                                                               |
| <input type="checkbox"/> | نعم ... بدون اعراض ((Yes...without symptoms))                                                           |
| <input type="checkbox"/> | نعم.....اصبت باعراض وتم علاجي في المنزل<br>((Yes.....I had symptoms and was treated at home))           |
| <input type="checkbox"/> | نعم. .. اصبت باعراض وتم علاجي في المستشفى<br>((Yes. ...I had symptoms and was treated in the hospital)) |

27. أي من الجرعات التي تلقيتها تعتبر الأكثر أعراض أو مضاعفات :

((27. Which of the doses you received is considered to have the most symptoms or complications:))

|                          |                    |
|--------------------------|--------------------|
| <input type="checkbox"/> | الاولي ((first))   |
| <input type="checkbox"/> | الثانية ((second)) |
| <input type="checkbox"/> | الثالثة ((third))  |
| <input type="checkbox"/> | لا يوجد ((none))   |

شكرا لحسن تعاونكم معنا ----- نتمني لكم الصحة والعافية

((Thank you for your cooperation ----- We wish you good health))
